# Supplementary material for: Statistical support for the hypothesis of developmental constraint in marsupial skull evolution
Source: PubMed Central journal article supplement (PMC3660189; doi:10.1186/1741-7007-11-52), 2013-04-26

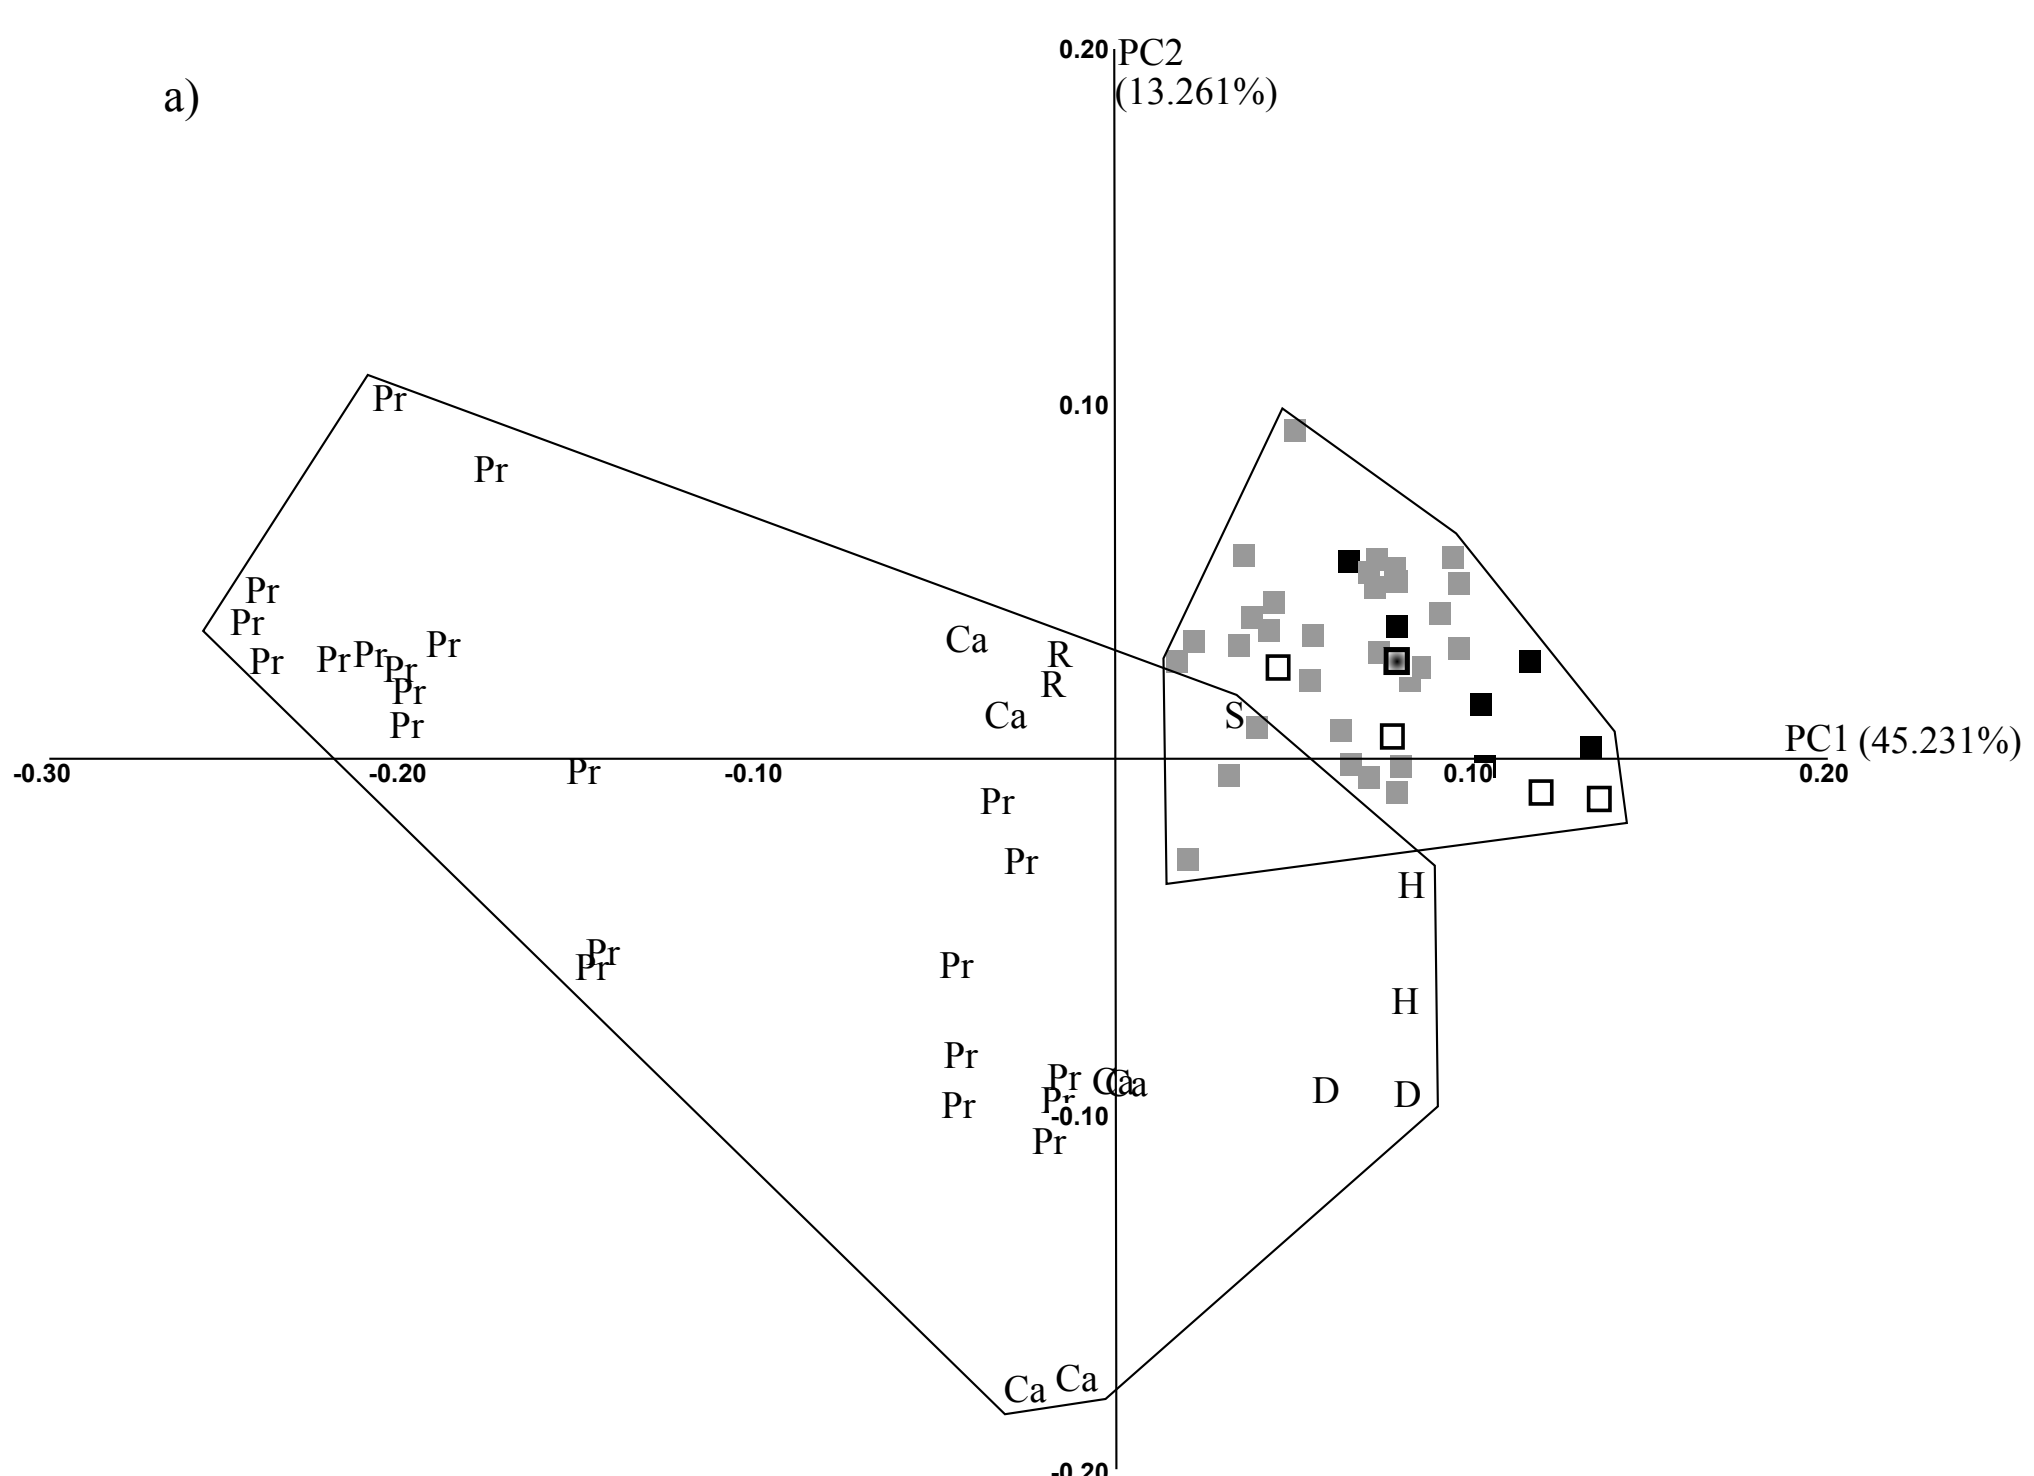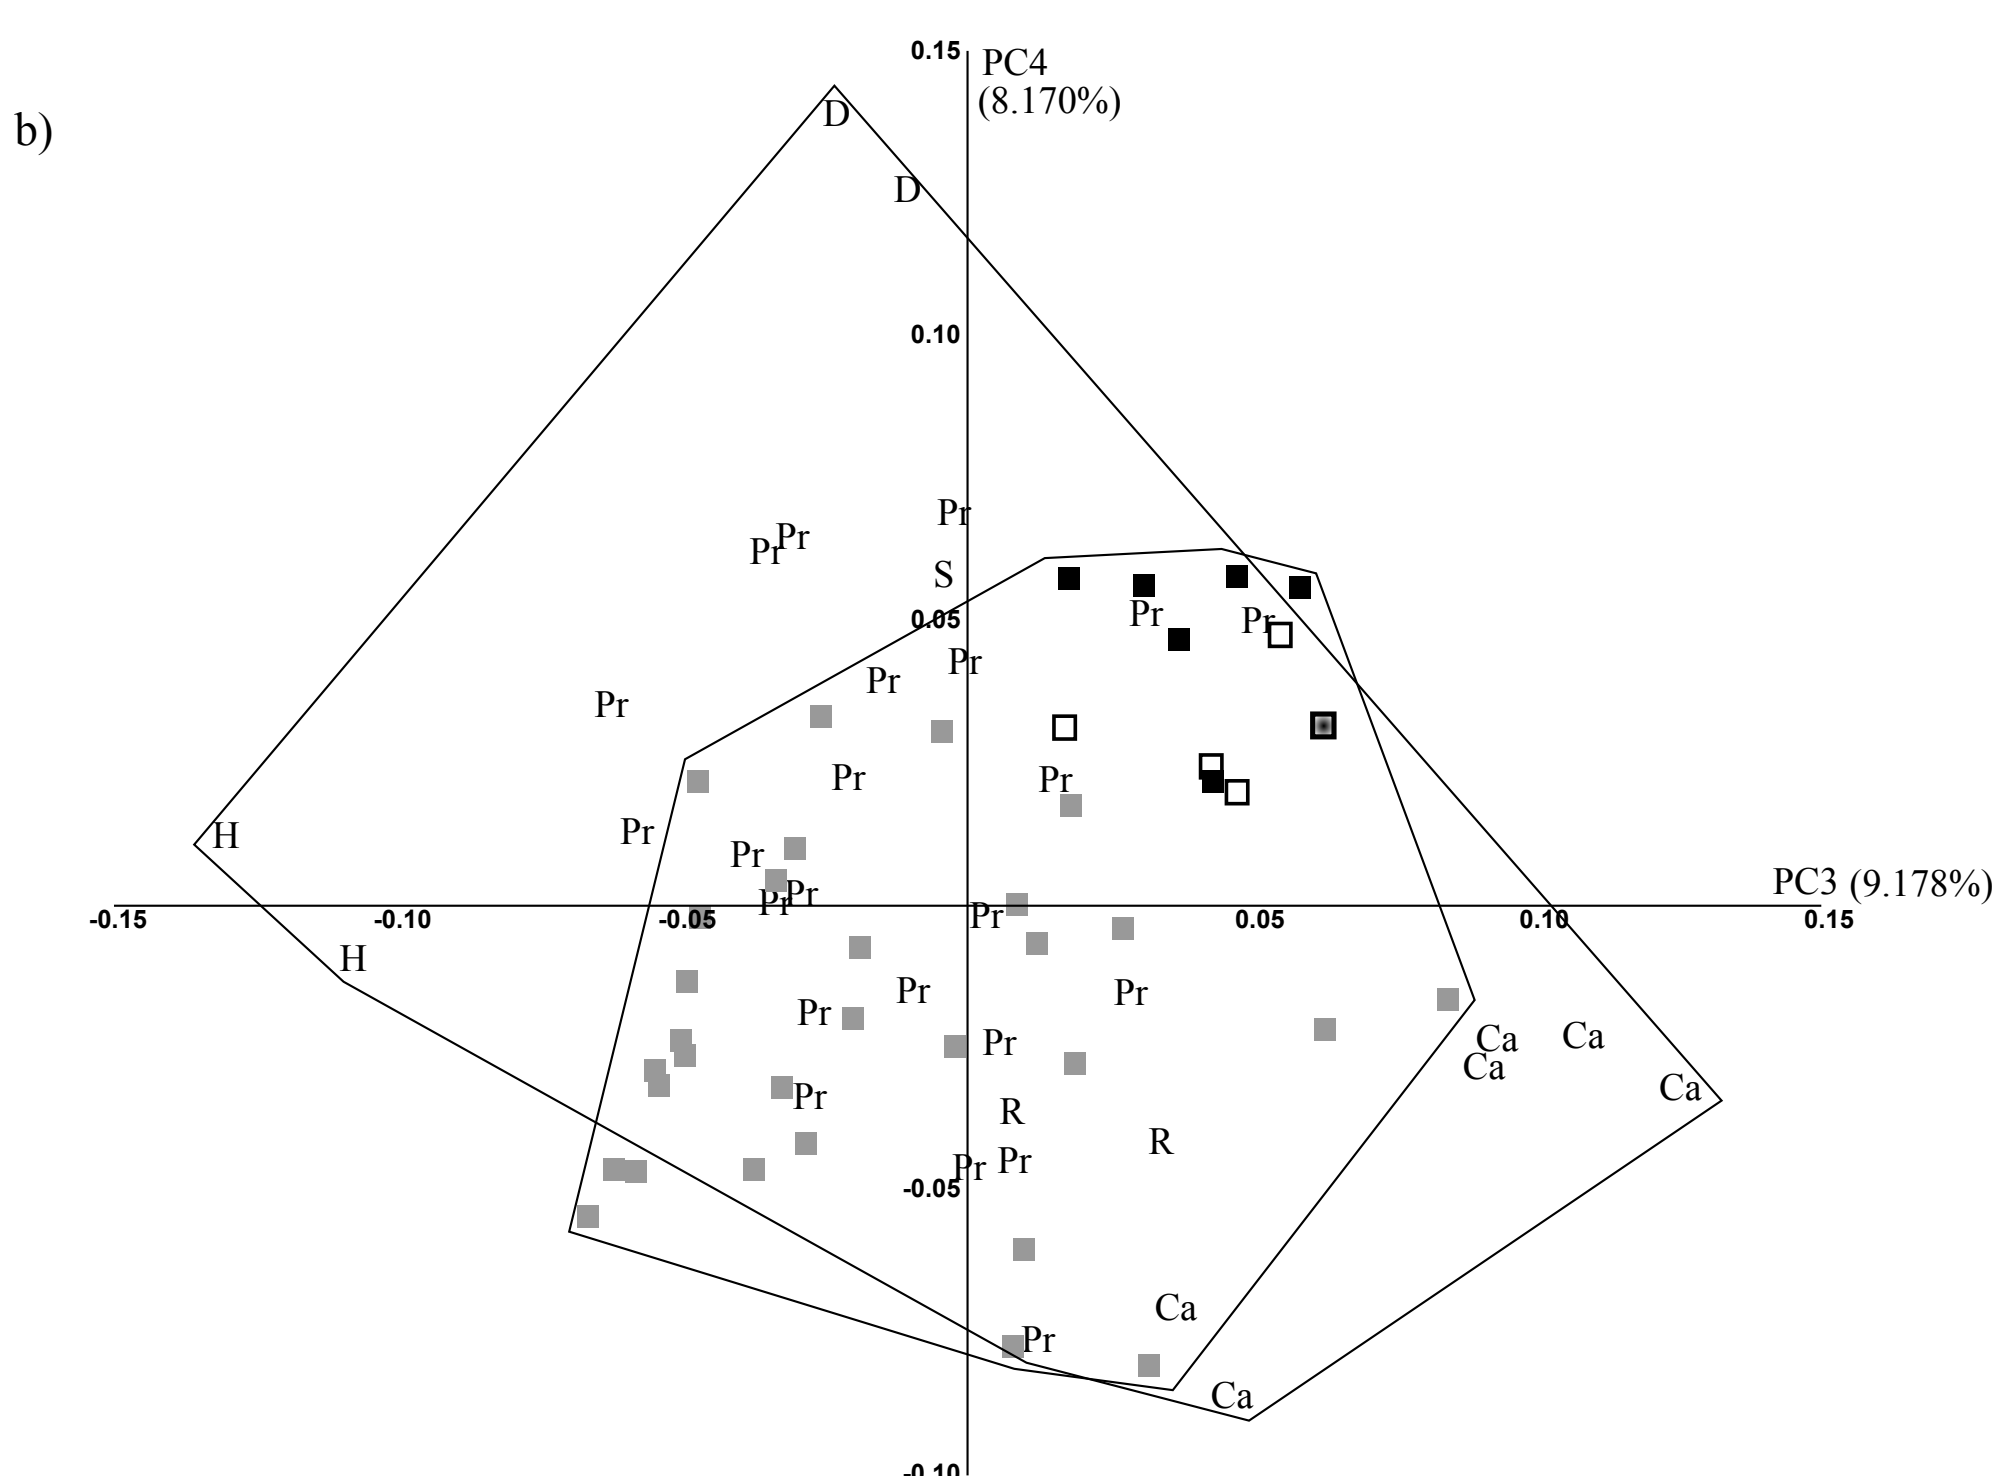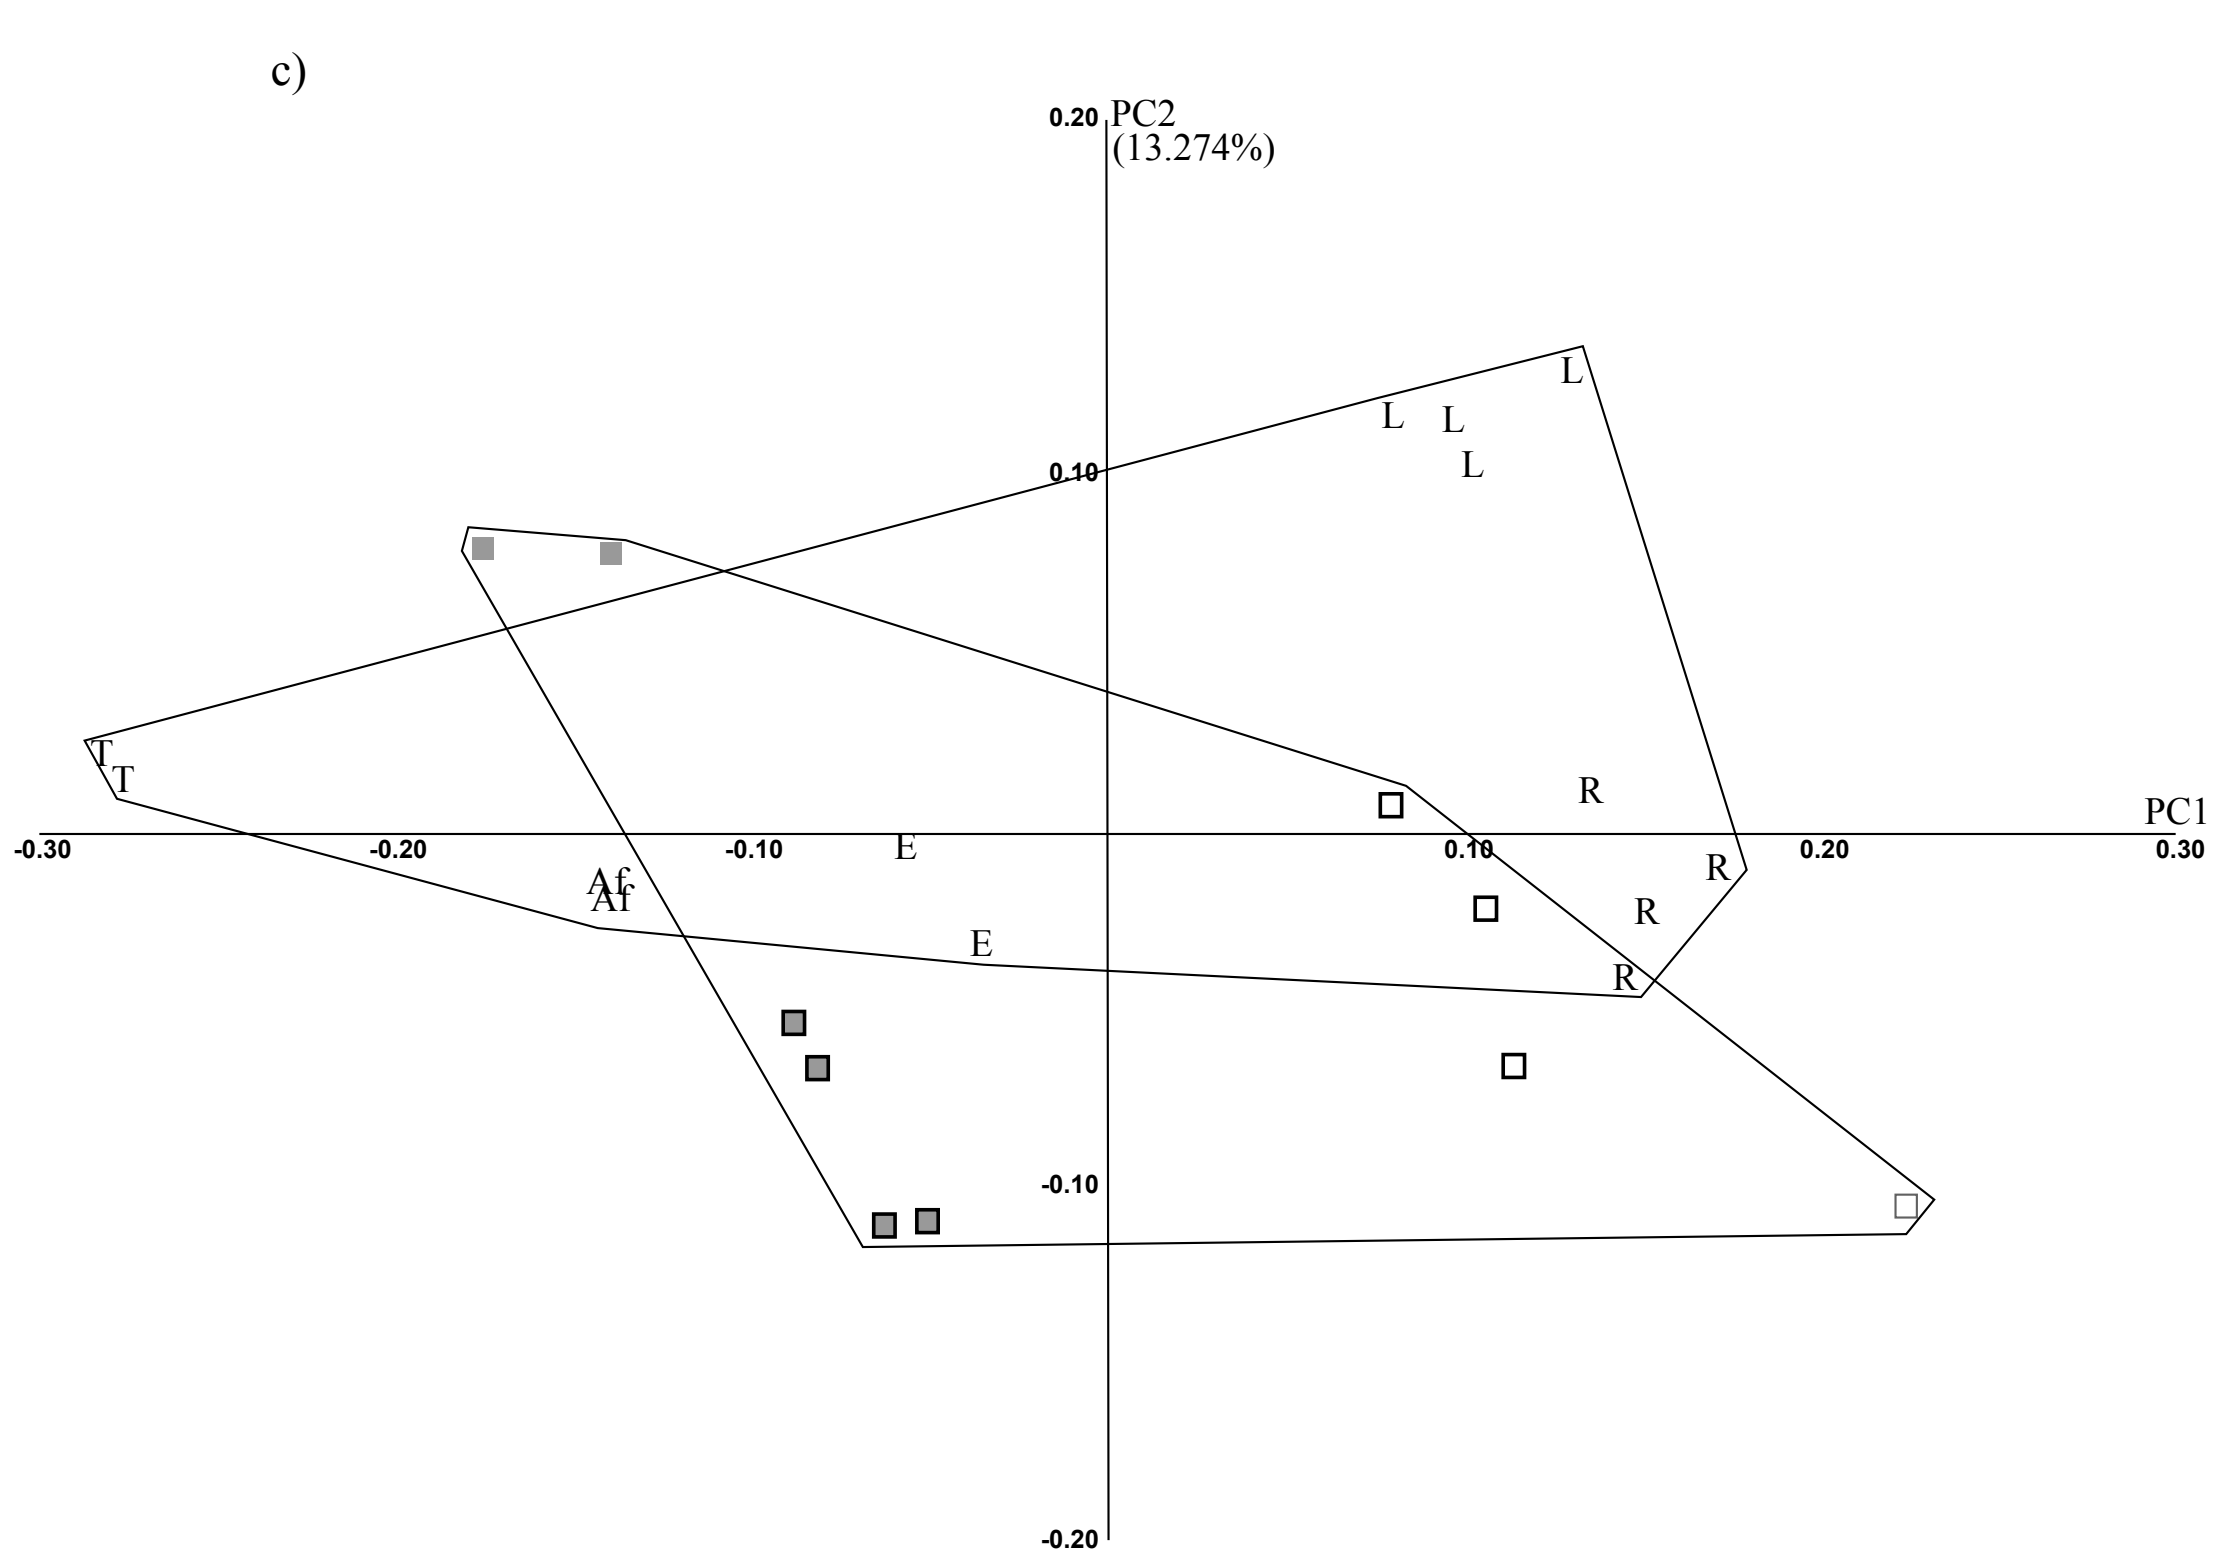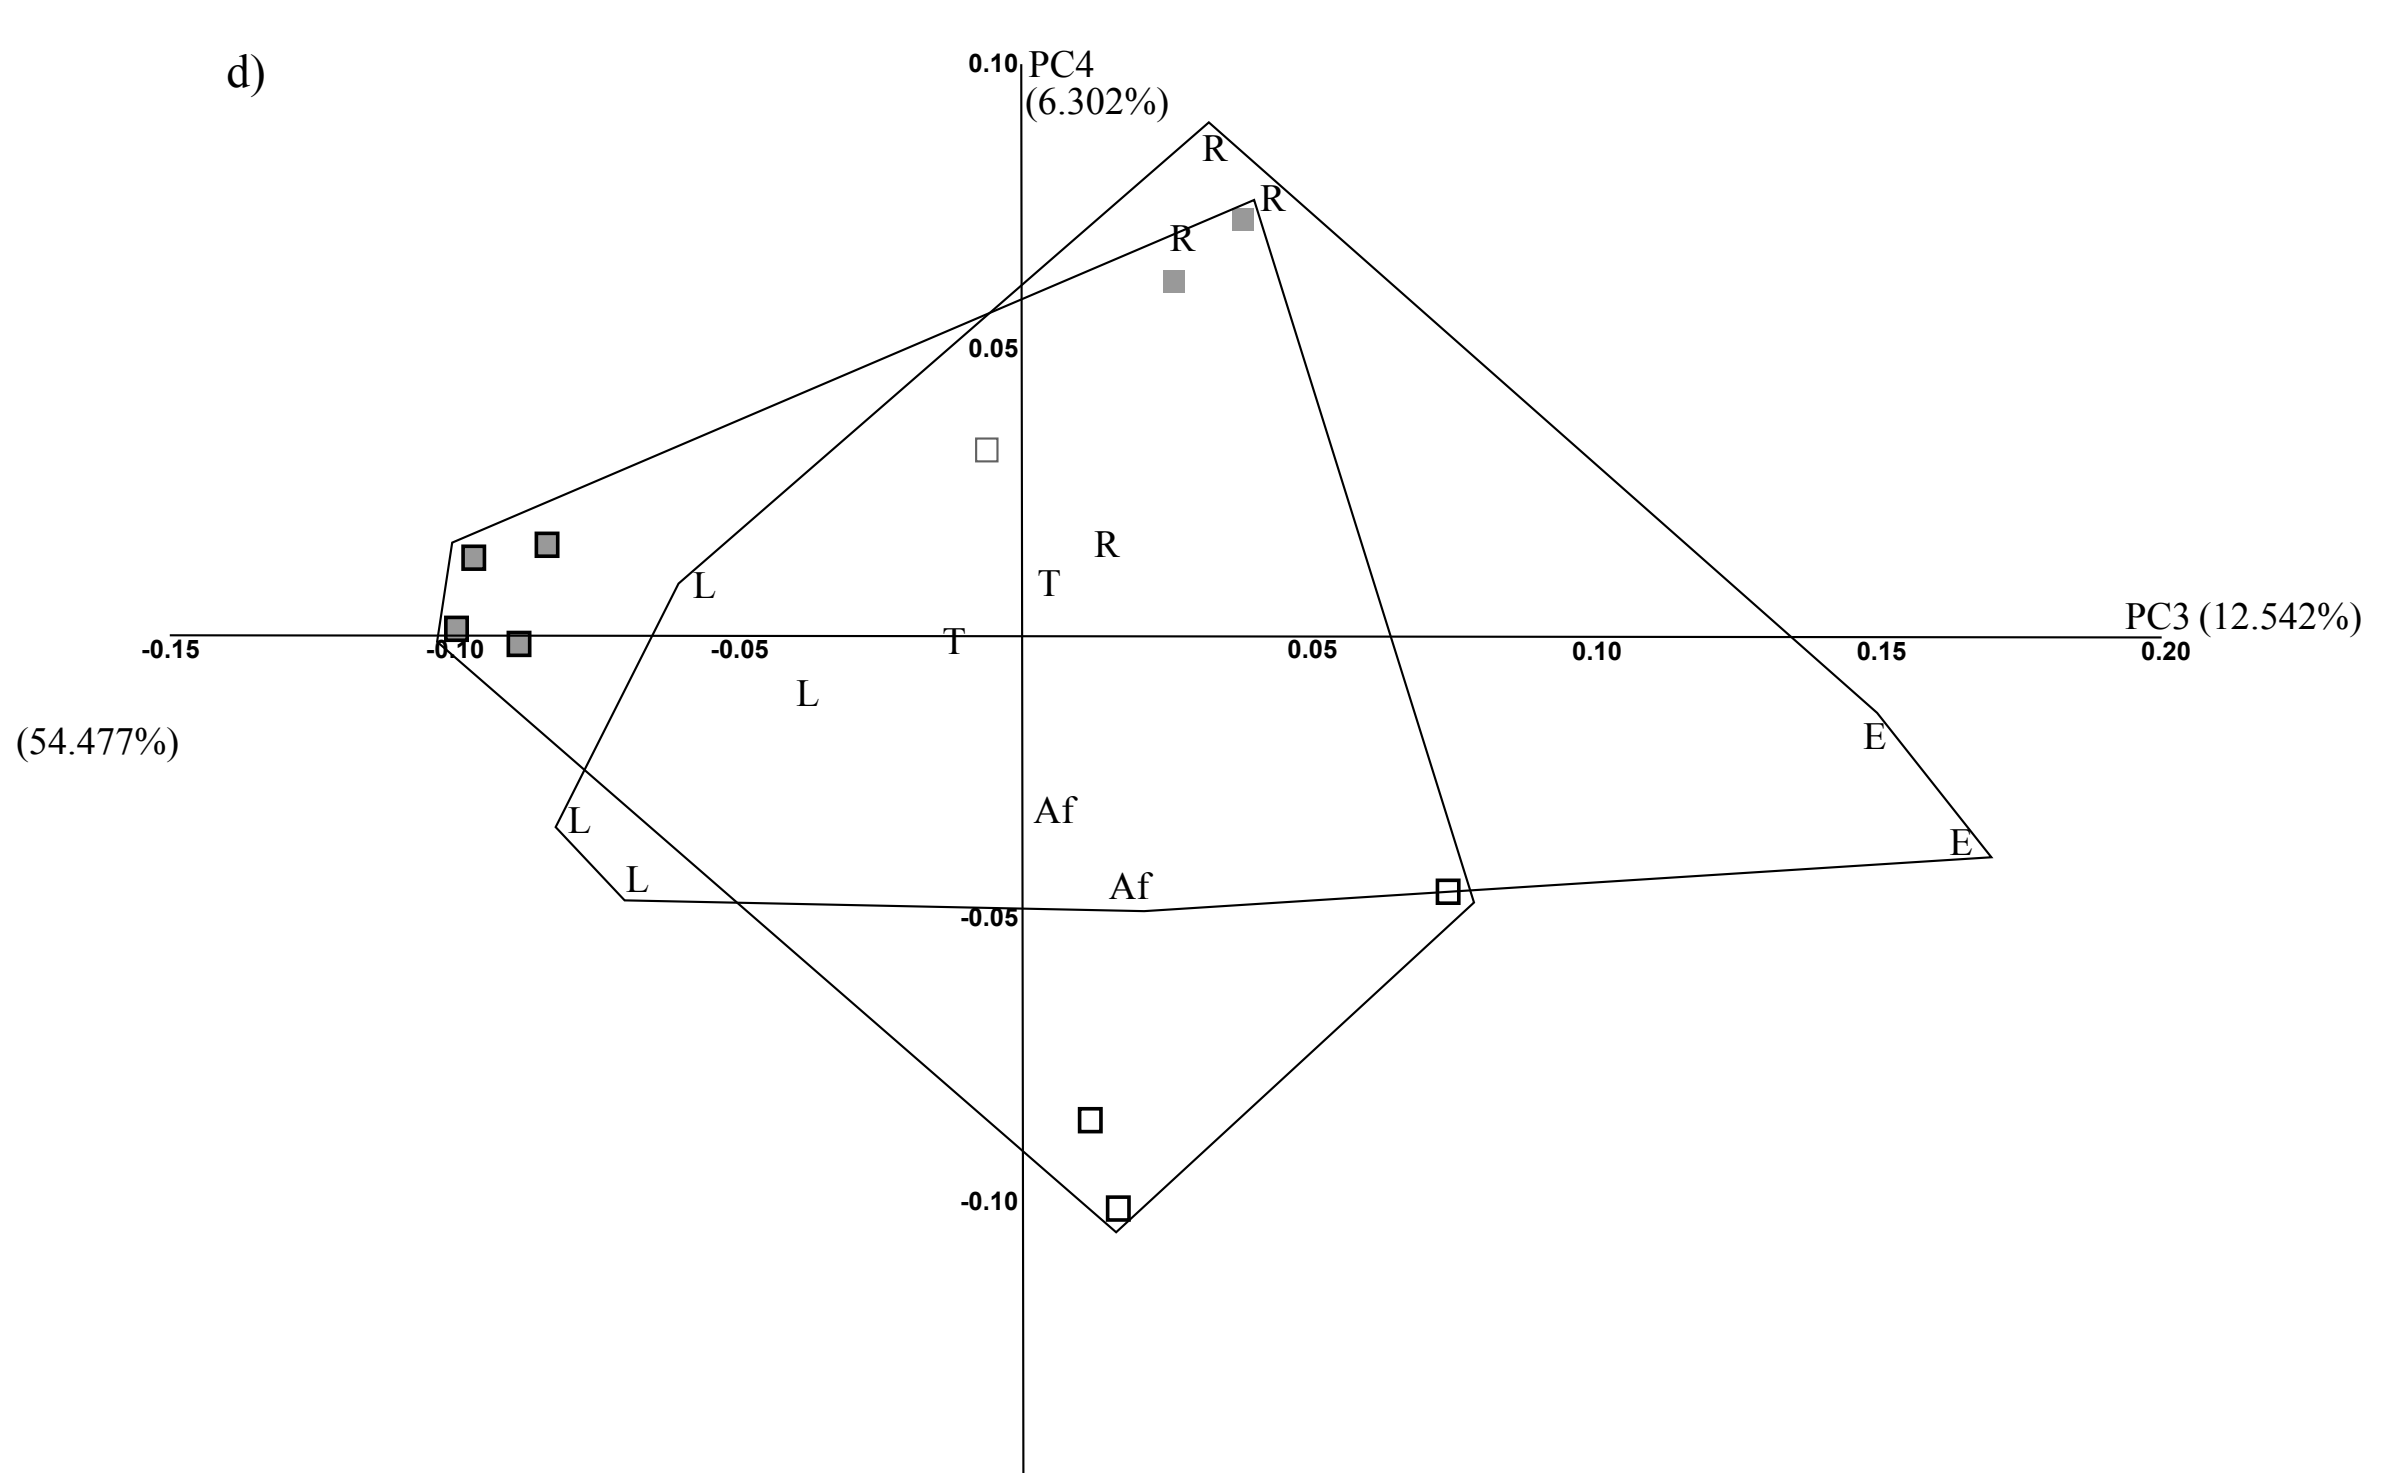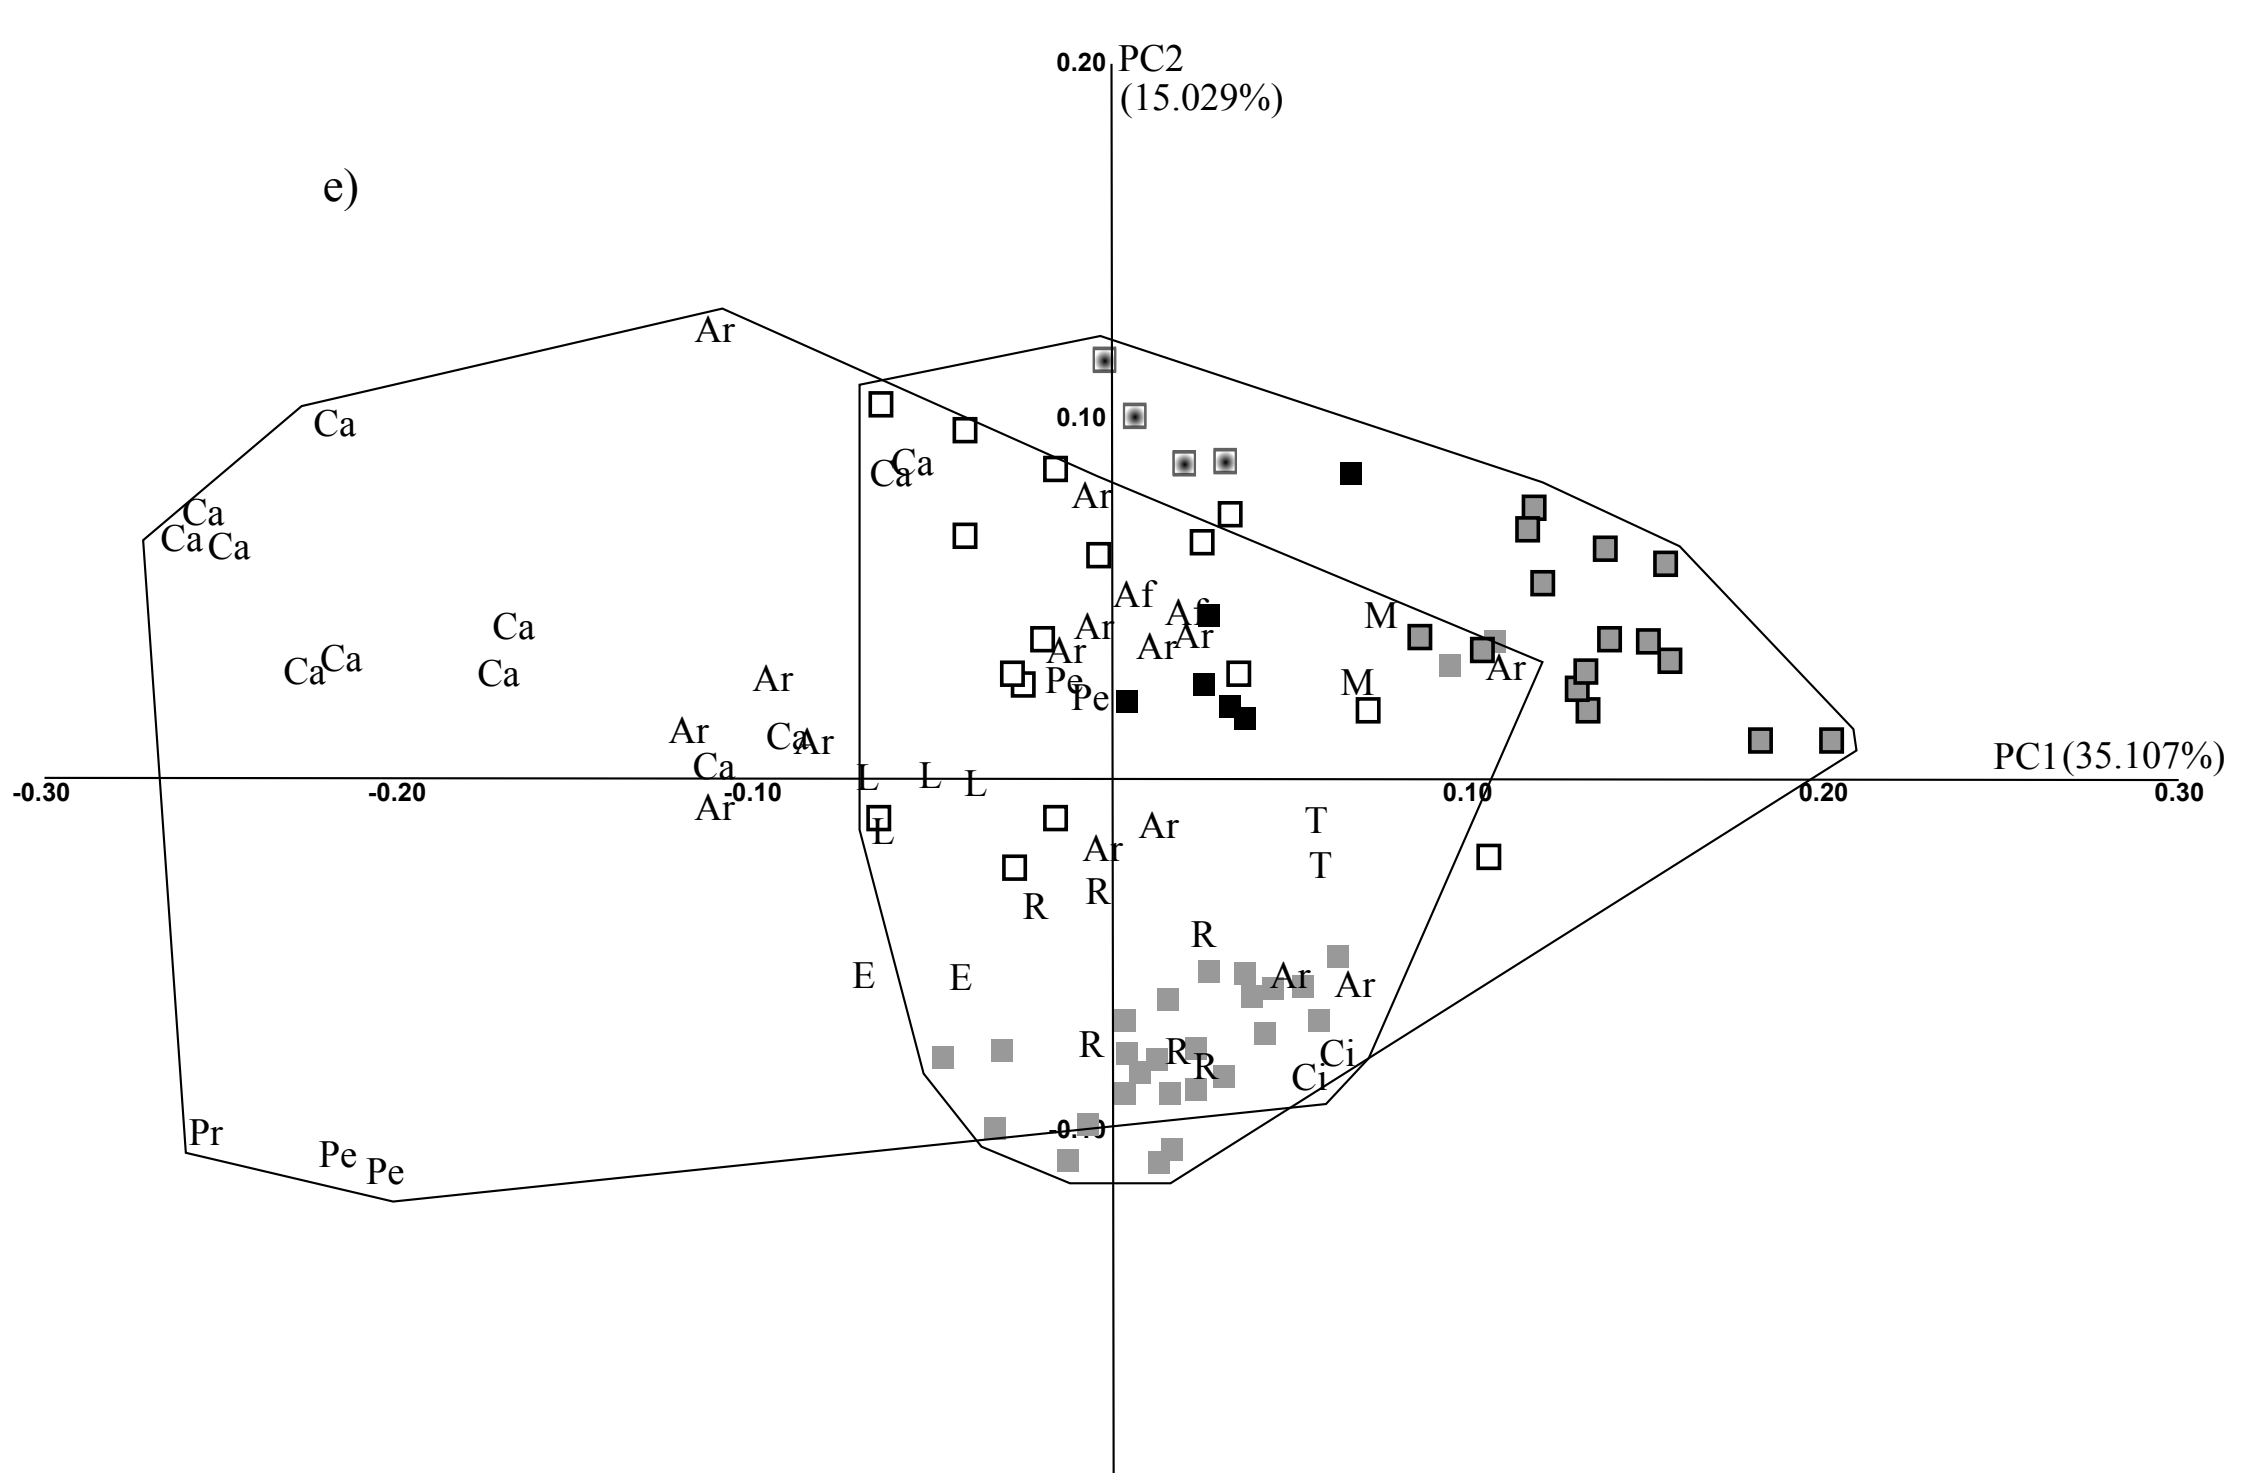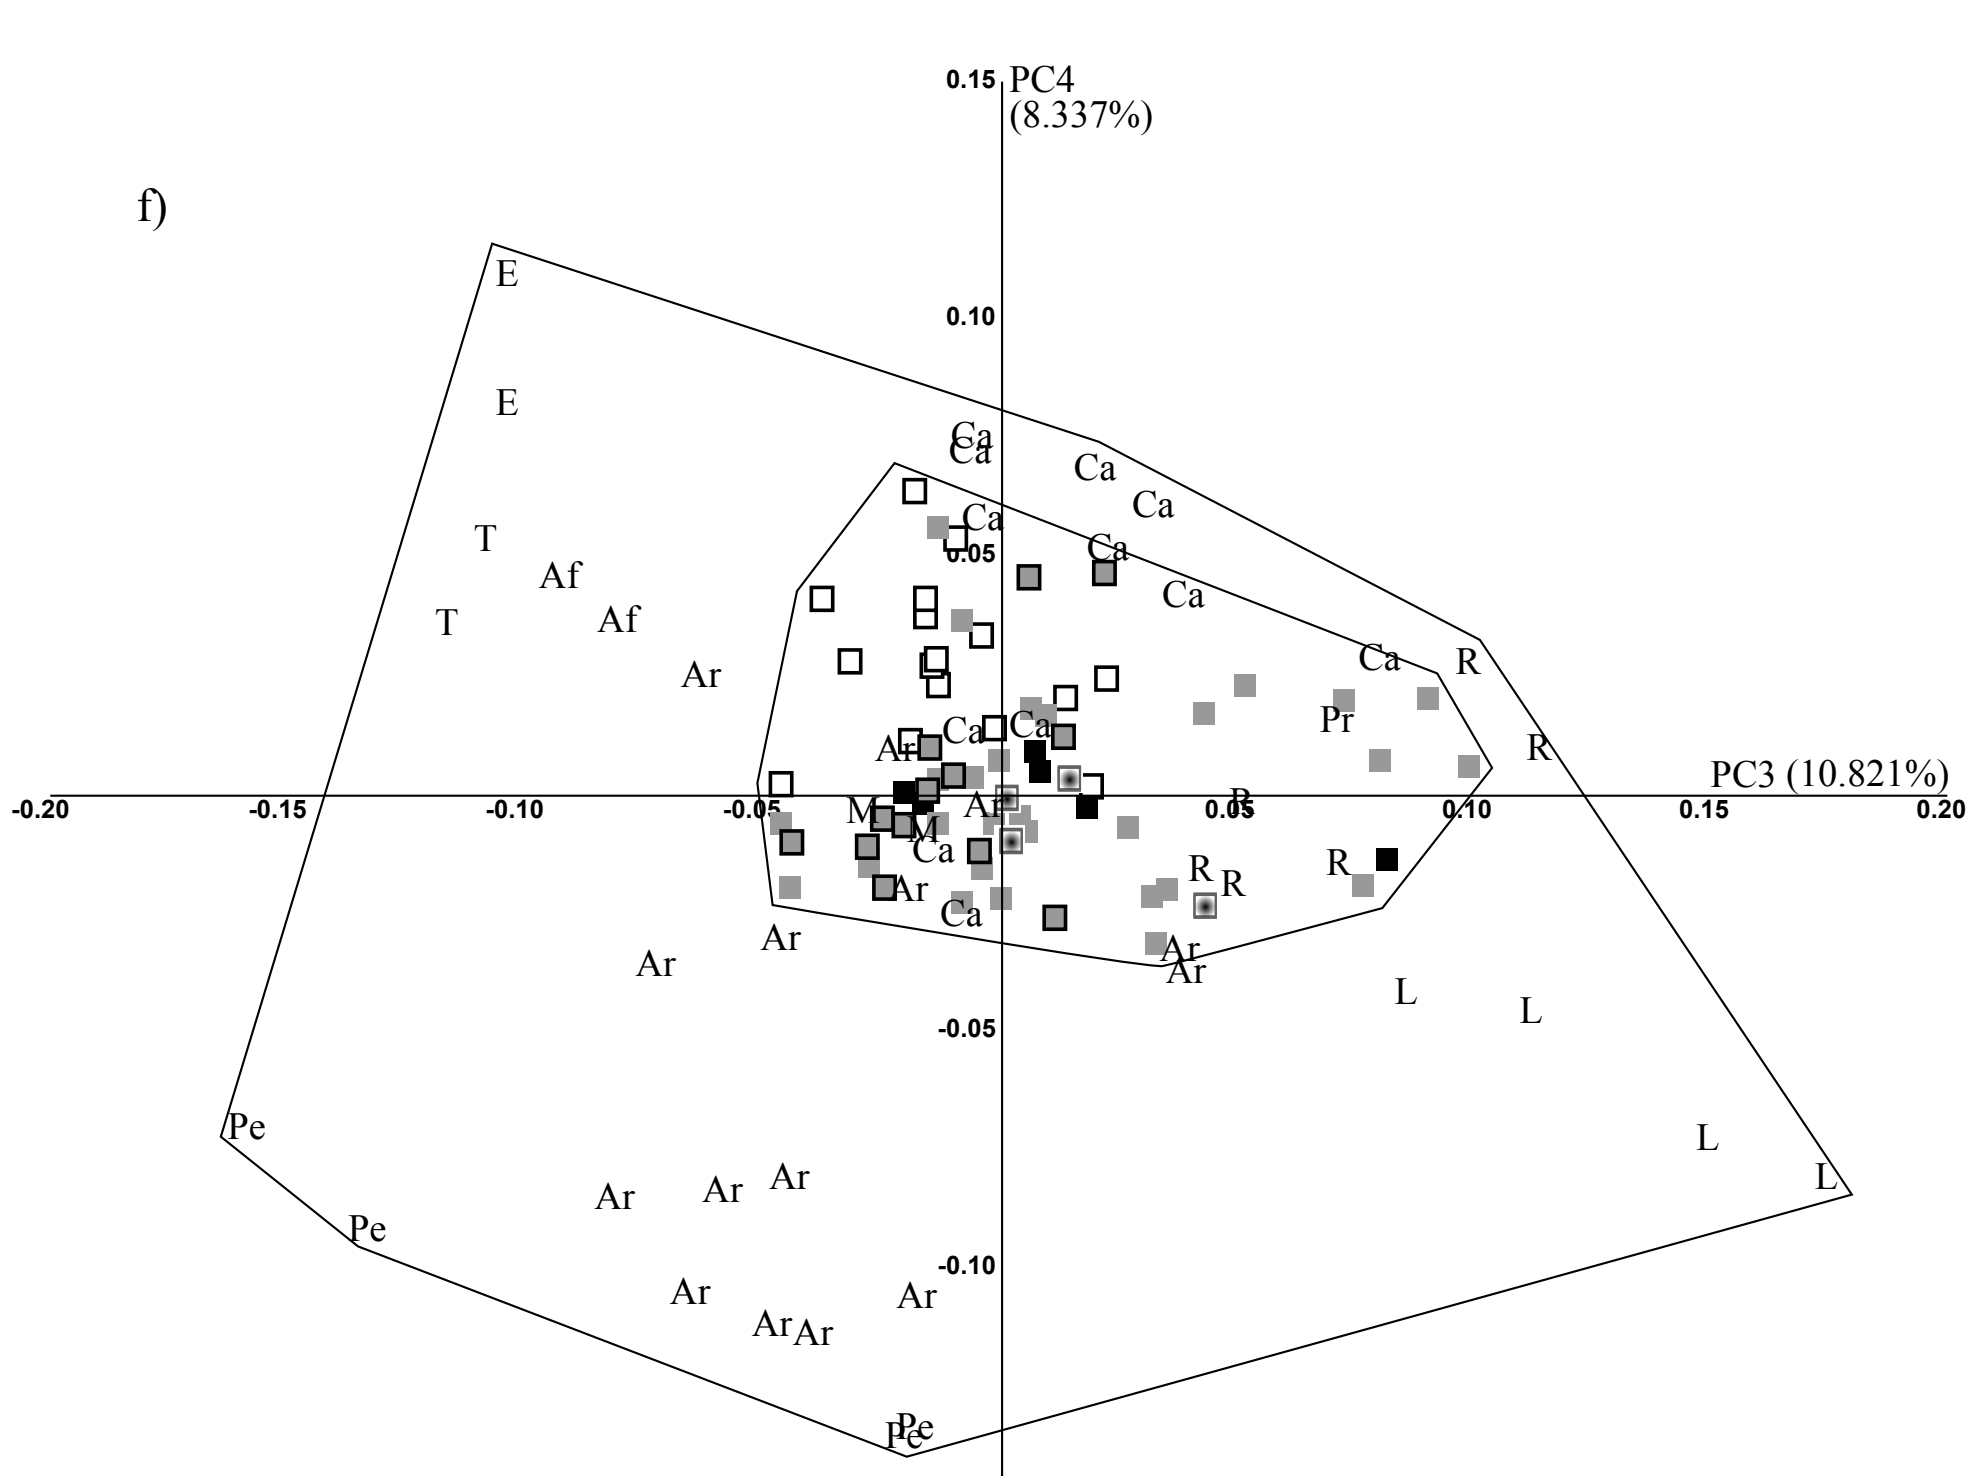

Supplement: 1741-7007-11-52-S3.pdf [file 1741-7007-11-52-S3.pdf]
